# Supplementary material for: A robotic sensory system with high spatiotemporal resolution for texture recognition
Source: PubMed Central journal article supplement (PMC10645869; doi:10.1038/s41467-023-42722-4), 2023-11-14
Supplement: 41467_2023_42722_MOESM1_ESM.pdf [file 41467_2023_42722_MOESM1_ESM.pdf]

# Supplementary Information for

## **A robotic sensory system with high spatiotemporal resolution for texture recognition**

Ningning Bai<sup>1,2,5</sup>, Yiheng Xue<sup>3,5</sup>, Shuiqing Chen<sup>3</sup>, Lin Shi<sup>1</sup>, Junli Shi<sup>1</sup>, Yuan Zhang<sup>1</sup>, Xingyu Hou<sup>1</sup>,  
Yu Cheng<sup>1</sup>, Kaixi Huang<sup>1</sup>, Weidong Wang<sup>2</sup>, Jin Zhang<sup>3</sup>, Yuan Liu<sup>4</sup>, Chuan Fei Guo<sup>1,\*</sup>

<sup>1</sup>Department of Materials Science and Engineering, Southern University of Science and Technology,  
Shenzhen 518055, China

<sup>2</sup>School of Mechano-Electronic Engineering, Xidian University, Xi'an 710071, China

<sup>3</sup>Department of Computer Science and Engineering, Southern University of Science and Technology,  
Shenzhen 518055, China

<sup>4</sup>Department of Physics and TcSUH, University of Houston, Houston TX 77204, USA

<sup>5</sup>These authors contributed equally: Ningning Bai, Yiheng Xue

\*To whom correspondence should be addressed. E-mail: [guocf@sustech.edu.cn](mailto:guocf@sustech.edu.cn)

**The file includes:**

Supplementary Table 1. Information of the 20 textiles used in this work.

Supplementary Table 2. Top ten important extracted signal features.

Supplementary Table 3. Comparison of our sensing system based on the slip-sensor with reported sensory systems in terms of acquisition system and recognition accuracy.

Supplementary Fig. 1. SEM image showing the cross section of a human fingerprint replica.

Supplementary Fig. 2. Change in capacitance over 10,000 loading-release cycles under a peak pressure of 100 kPa, with a total test time of ~14.5 h.

Supplementary Fig. 3 Hysteresis curve of the slip-sensor during a loading-unloading cycle.

Supplementary Fig. 4. The capacitance of the slip-sensor at different pressures.

Supplementary Fig. 5. Stress-strain curves of PDMS, a soft PVA-H<sub>3</sub>PO<sub>4</sub> film, and the PVA-H<sub>3</sub>PO<sub>4</sub> film which is used as the ionic layer in our sensor.

Supplementary Fig. 6. Response to different microstructures of the sensor with fingerprint tip size of 25  $\mu\text{m}$ .

Supplementary Fig. 7. Signals to the microstructures with a spacing of 15  $\mu\text{m}$  at a sliding rate of 1.0  $\text{mm}\cdot\text{s}^{-1}$  under contact pressures of 2, 10, and 20 kPa.

Supplementary Fig. 8. Signal of the slip-sensor by sliding on fine textures with a spacing of 15  $\mu\text{m}$  and a height of 6  $\mu\text{m}$  at a sliding rate of 1  $\text{mm}\cdot\text{s}^{-1}$ .

Supplementary Fig. 9. Recognition accuracy of surface structures with different feature spacings by five volunteer subjects.

Supplementary Fig. 10. Effect of elastic modulus on signal magnitudes.

Supplementary Fig. 11. SEM images of the 20 textiles under test.

Supplementary Fig. 12. Schematic design diagram of the digital circuit board.

Supplementary Fig. 13. Frequency-domain signals of the 20 textiles obtained using wavelet transform.

Supplementary Fig. 14. Recognition accuracy of the 20 textiles at a high sliding rate of 40  $\text{mm}\cdot\text{s}^{-1}$ .

Supplementary Fig. 15. Time-domain signals of the slip-sensor corresponding to different textures under random sliding rates and pressures.

Supplementary Fig. 16. Change in acceleration of subject A when sliding on 20 textiles, with 200 times of sliding for each textile.

Supplementary Fig. 17. Change in acceleration of subject B when sliding on 20 textiles, with 100 times of sliding for each textile.

Supplementary Fig. 18. Change in acceleration of subject C when sliding on 20 textiles, with 100 times of sliding for each textile.

Supplementary Fig. 19. Recognition accuracies of the 20 textiles using a sensor without fingerprint.

Supplementary Fig. 20. The signal-to-noise ratio (SNR) and effective number of bits (ENOB) of the signal output of the slip-sensor.

Supplementary Fig. 21. Schematic for the preparation of the slip-sensor.

The supplementary note: recognition of microstructures by human subjects.

**Supplementary Table 1. Information of the 20 textiles used in this work.**

| Number | Name and source                  | Type           | Components                           |
|--------|----------------------------------|----------------|--------------------------------------|
| 1      | Blended double coat fabric       | Blended fabric | 40% Rayon, 46% Terylene, 14% Nylon   |
| 2      | Pure wool fine grain coat        | Pure wool      | 100% Wool                            |
| 3      | Khaki trench coat fabric         | Pure cotton    | 100% Cotton                          |
| 4      | Blended linen fabric             | Blended fabric | 80% Linen, 20% Cotton                |
| 5      | Polyester imitation cotton cloth | Blended fabric | 70% Terylene, 30% Rayon              |
| 6      | Twill cloth                      | Pure cotton    | 100% Cotton                          |
| 7      | Laser phantom color down jacket  | Pure fabric    | 100% Terylene                        |
| 8      | Waterproof jacquard trench coat  | Pure fabric    | 100% Nylon                           |
| 9      | Cross print plain fabric         | Blended fabric | 50% Cotton, 50% Terylene             |
| 10     | Net yarn embroidery              | Pure fabric    | 100% Polyester                       |
| 11     | Super lightweight nylon fabric   | Pure fabric    | 100% Nylon                           |
| 12     | Seersucker                       | Pure fabric    | 100% Terylene                        |
| 13     | Striped blended cloth            | Blended fabric | 75% Cotton, 25% Spandex              |
| 14     | Corduroy                         | Pure cotton    | 100% Cotton                          |
| 15     | Jacquard fabric                  | Blended fabric | 65% Polyester, 33% Viscose, 2% Lycra |
| 16     | SUSTANS                          | Blended fabric | Novel bio-elastic short fiber        |
| 17     | Super imitation cotton           | Blended fabric | 70% Polyester, 30% Cotton            |
| 18     | Wool blended fabric              | Blended fabric | 55% Nylon, 25% Cotton, 20% Wool      |
| 19     | Stretch blend cloth              | Blended fabric | 65% Spandex, 35% Polyester           |
| 20     | Twill                            | Pure fabric    | 100% Polyester                       |

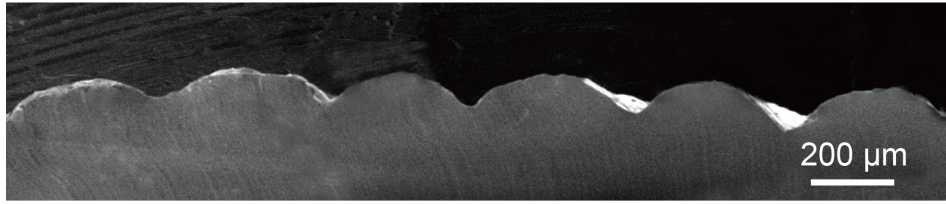

**Supplementary Fig. 1.** SEM image showing the cross section of a human fingerprint replica.

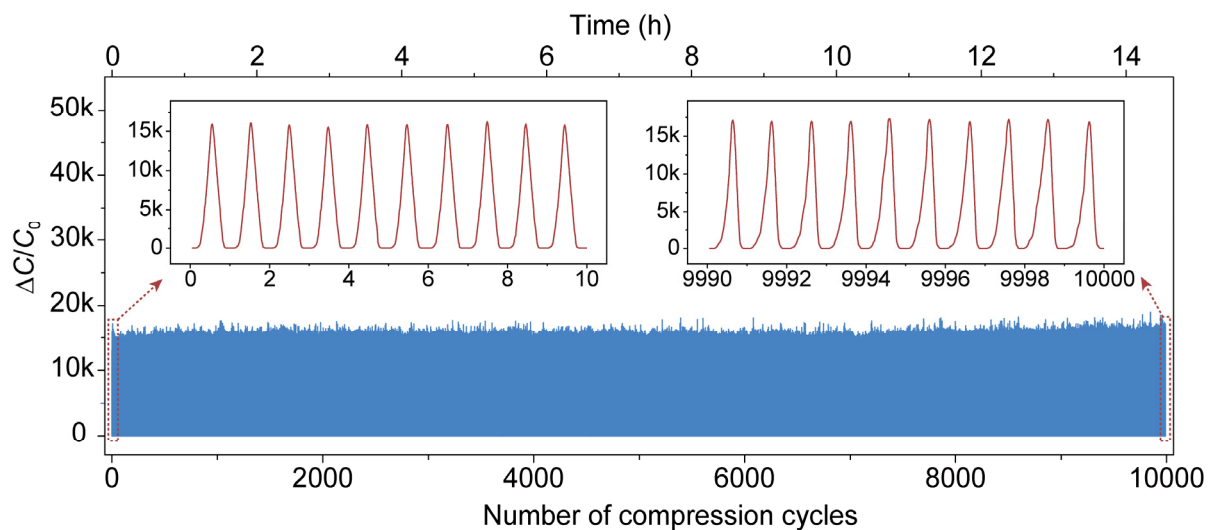

**Supplementary Fig. 2.** Change in capacitance over 10,000 loading-release cycles under a peak pressure of 100 kPa, with a total test time of ~14.5 h.

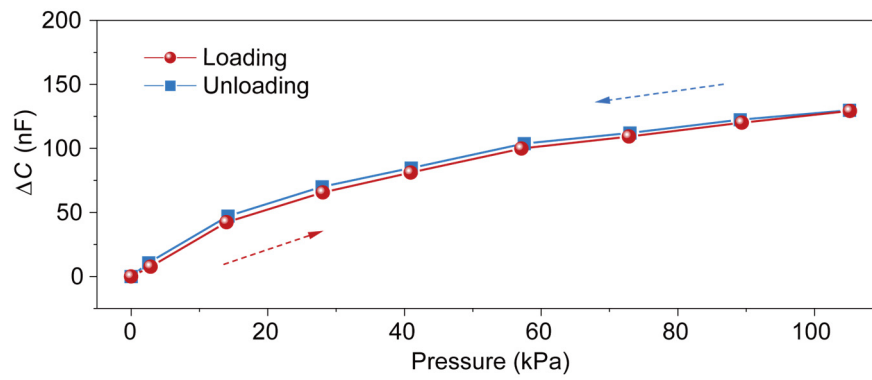

**Supplementary Fig. 3** Hysteresis curve of the slip-sensor during a loading-unloading cycle.

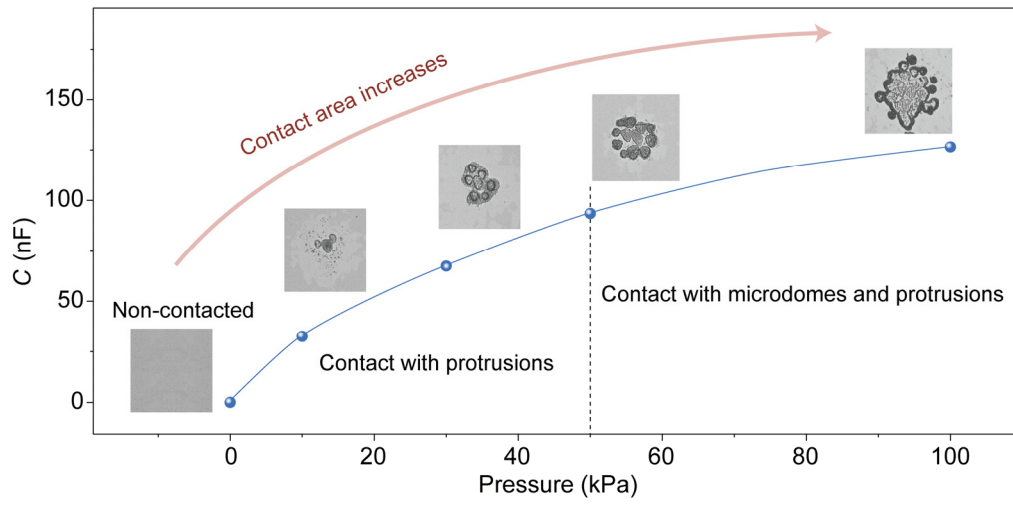

**Supplementary Fig. 4.** The Capacitance of the slip-sensor at different pressures. The inset pictures show the interfacial contact area under different pressures.



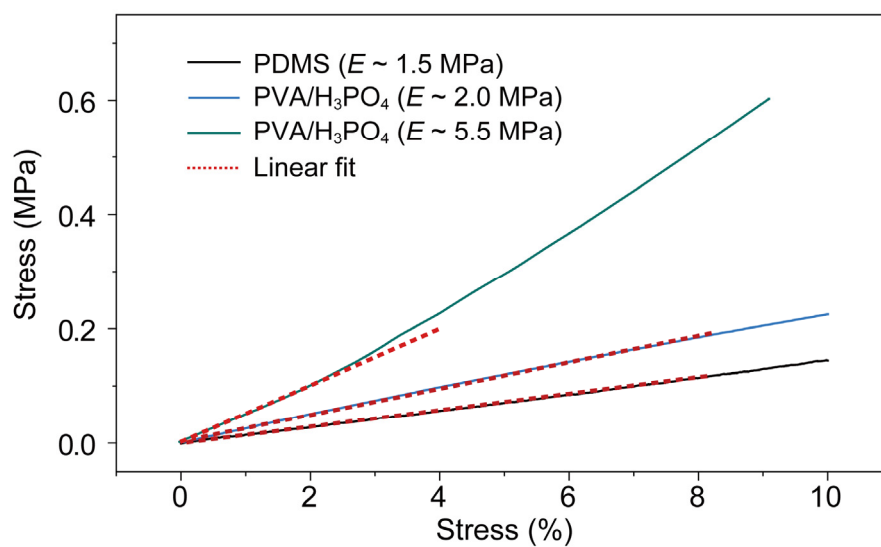

**Supplementary Fig. 5.** Stress-strain curves of PDMS, a soft PVA-H<sub>3</sub>PO<sub>4</sub> film, and the PVA-H<sub>3</sub>PO<sub>4</sub> film which is used as the ionic layer in our sensor. The specimens exhibit Young's moduli of 1.5, 2.0, and 5.5 MPa, respectively.

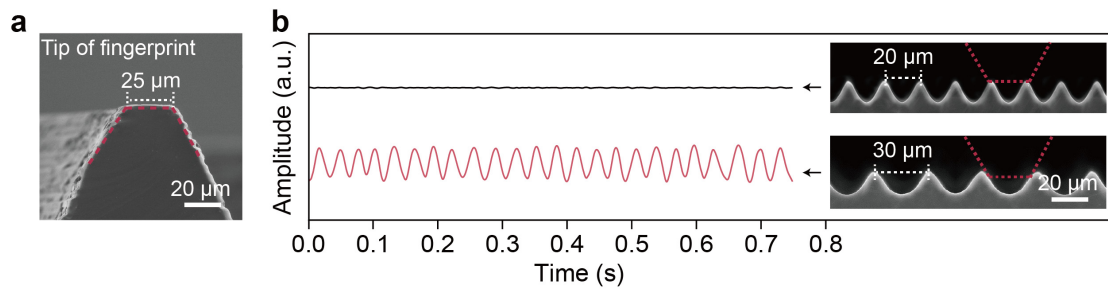

**Supplementary Fig. 6. Response to different microstructures of the sensor with fingerprint tip size of 25 μm. a** SEM image of an artificial fingerprint with a ridge tip width of 25 μm. **b** Signals of the slip-sensor with a fingerprint tip width of 25 μm when sliding on surface features with spacings of 20 and 30 μm at a sliding rate of 1 mm·s<sup>-1</sup>. Insets are SEM images of the surface structures. Here, “a. u.” signifies “arbitrary unit”.

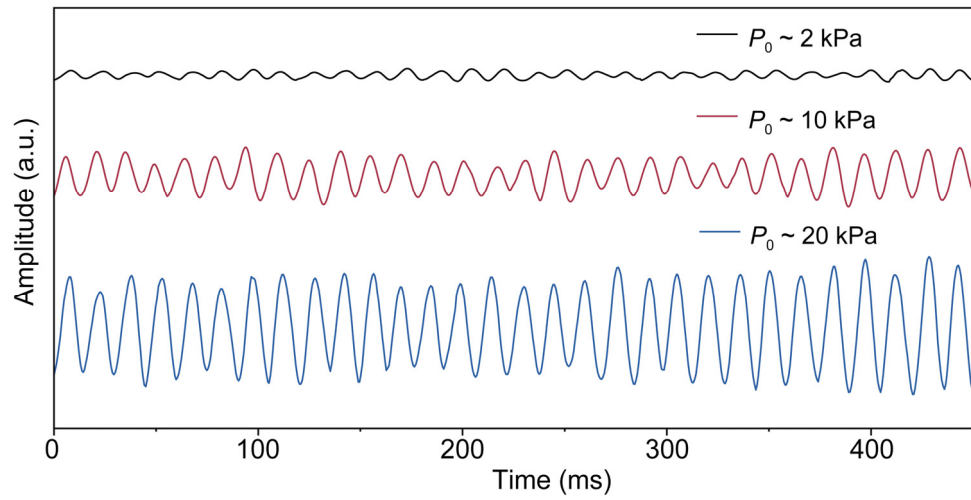

**Supplementary Fig. 7.** Signals to the microstructures with a spacing of  $15 \mu\text{m}$  at a sliding rate of  $1.0 \text{ mm}\cdot\text{s}^{-1}$  under contact pressures of 2, 10, and 20 kPa.

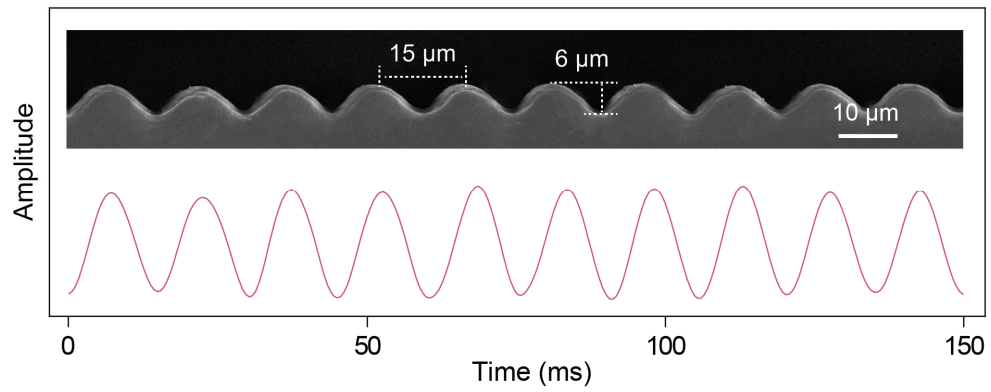

**Supplementary Fig. 8.** Signal of the slip-sensor by sliding on fine textures with a spacing of 15  $\mu\text{m}$  and a height of 6  $\mu\text{m}$  at a sliding rate of 1  $\text{mm}\cdot\text{s}^{-1}$ . The inset shows an SEM image of the texture.

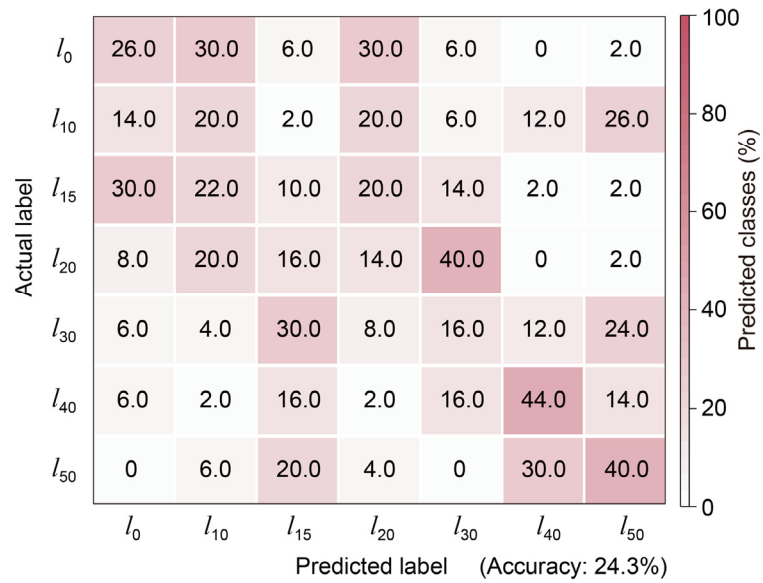

**Supplementary Fig. 9. Recognition accuracy of surface structures with different feature spacings by five volunteer subjects.** The labels  $l_0$  represents nonstructured surface; and  $l_{10}$ ,  $l_{15}$ ,  $l_{20}$ ,  $l_{30}$ ,  $l_{40}$ , and  $l_{50}$  represent the textures with feature spacing of 10, 15, 20, 30, 40, and 50  $\mu\text{m}$ , respectively.

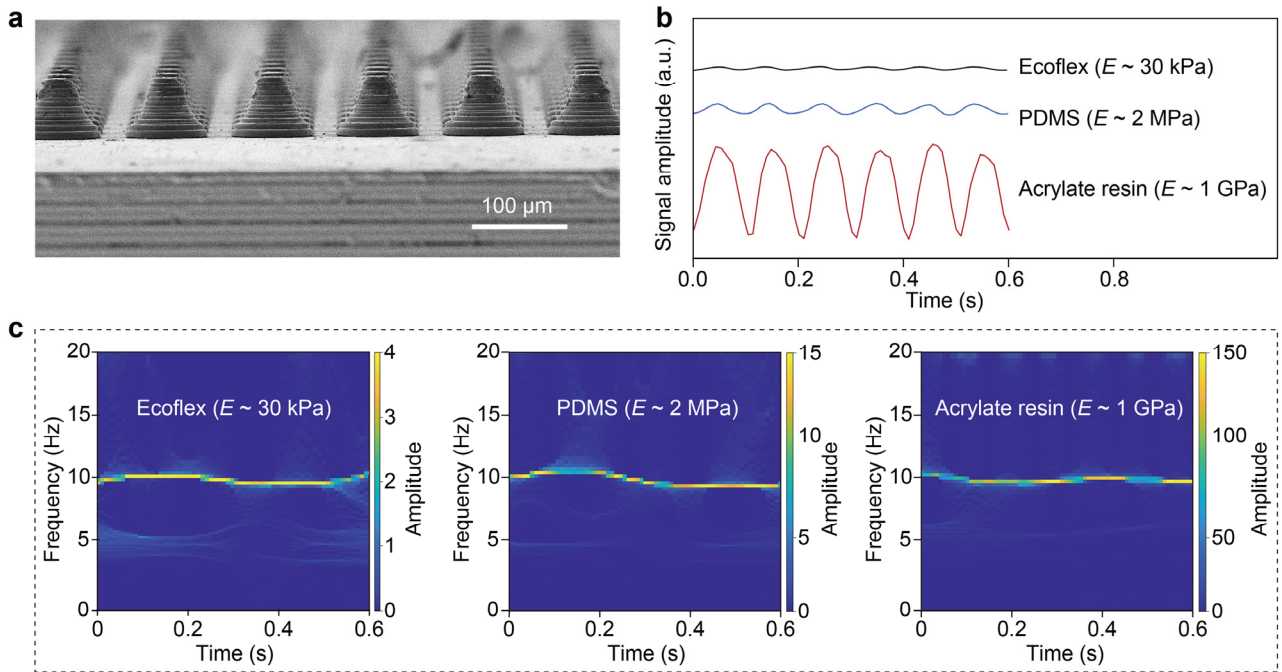

**Supplementary Fig. 10. Effect of elastic modulus on signal magnitudes.** **a** SEM image textures made of acrylate resin, and two other samples with the same structure made of Ecoflex and PDMS are also prepared. **b** Signals of the slip-sensor when the sensor slides over the surfaces of Ecoflex ( $E \sim 30 \text{ kPa}$ ), PDMS ( $E \sim 2 \text{ MPa}$ ), and resin ( $E \sim 1 \text{ GPa}$ ) structures. Sliding rate is  $1 \text{ mm}\cdot\text{s}^{-1}$ . **c** Frequency-domain signals corresponding to panel (b).

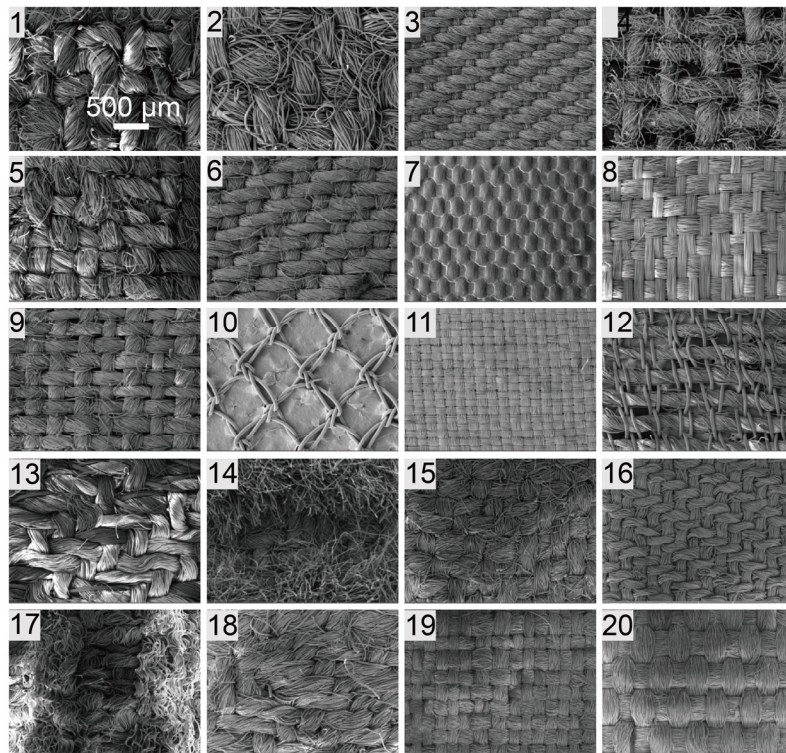

**Supplementary Fig. 11.** SEM images of the 20 textiles.

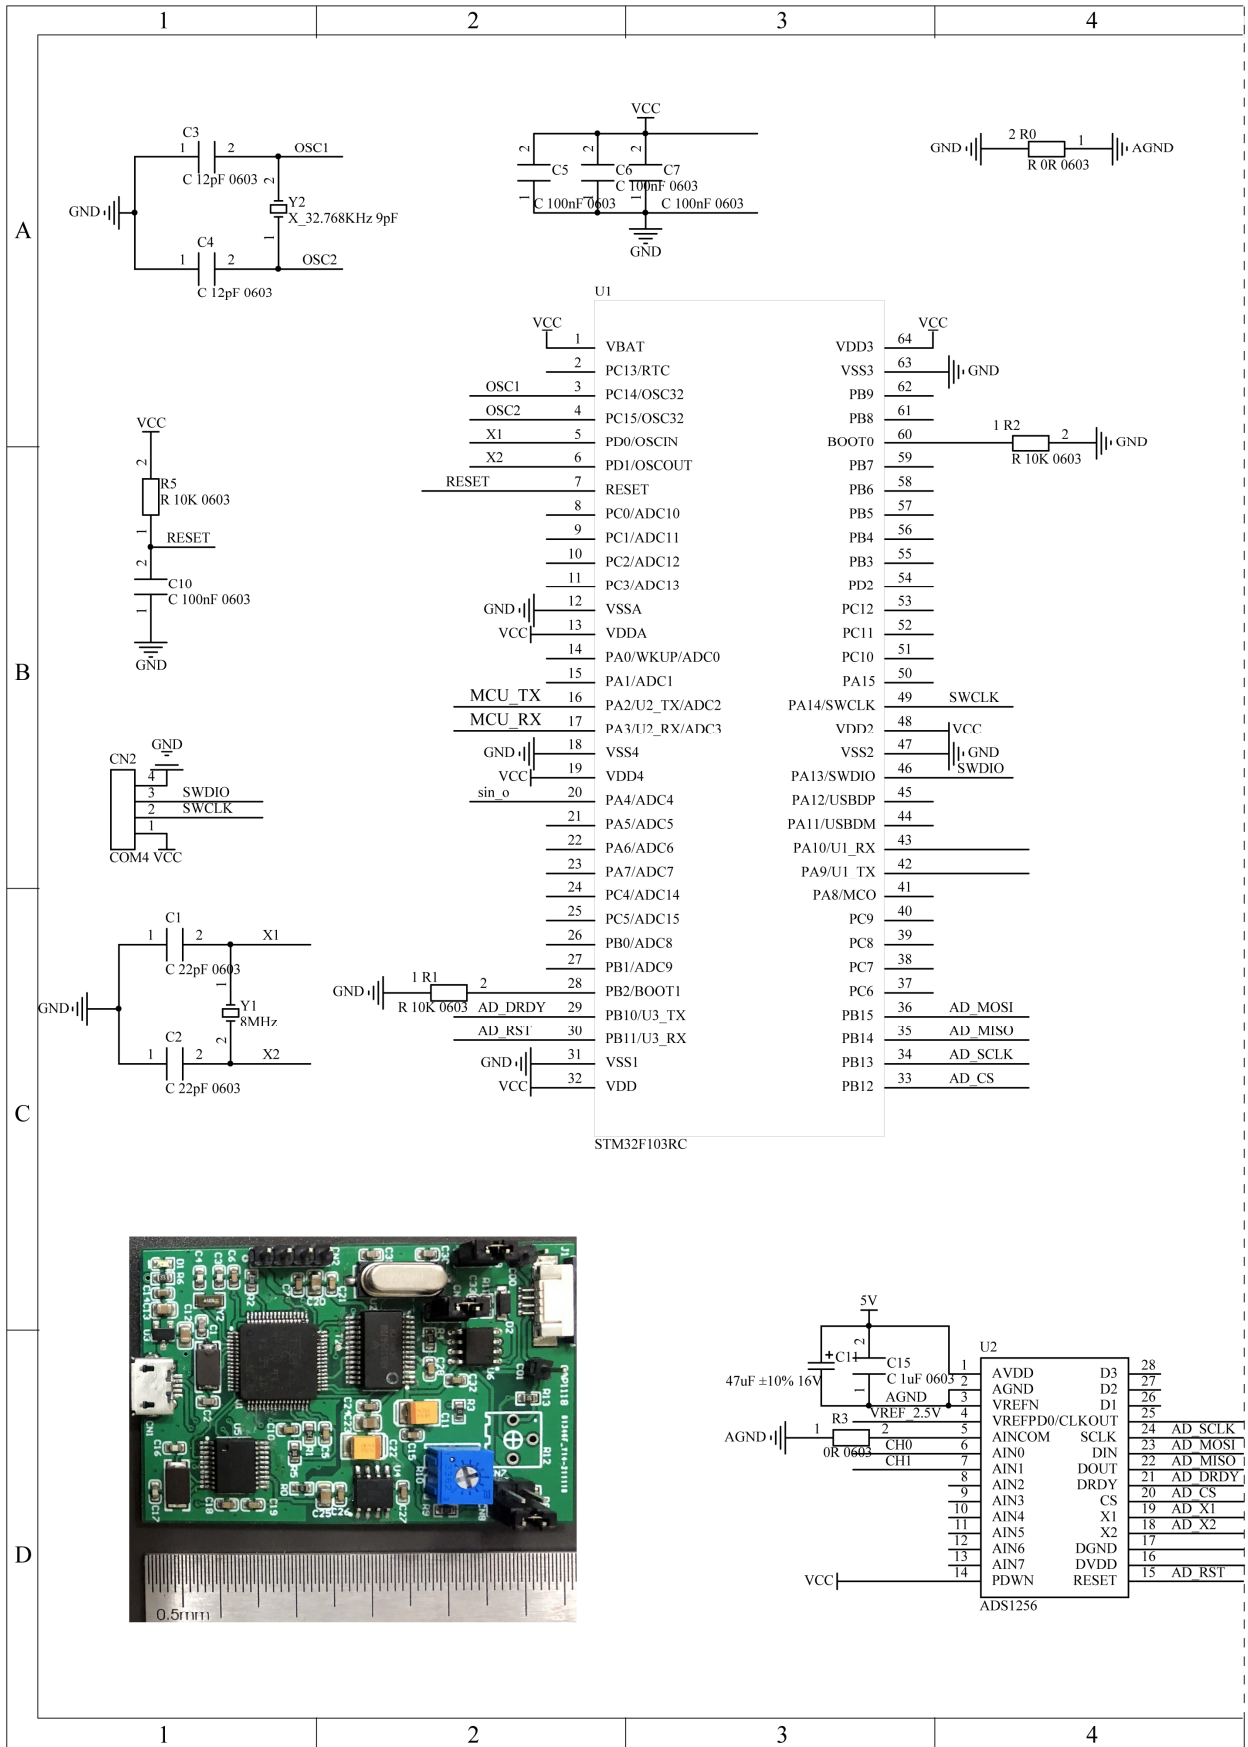



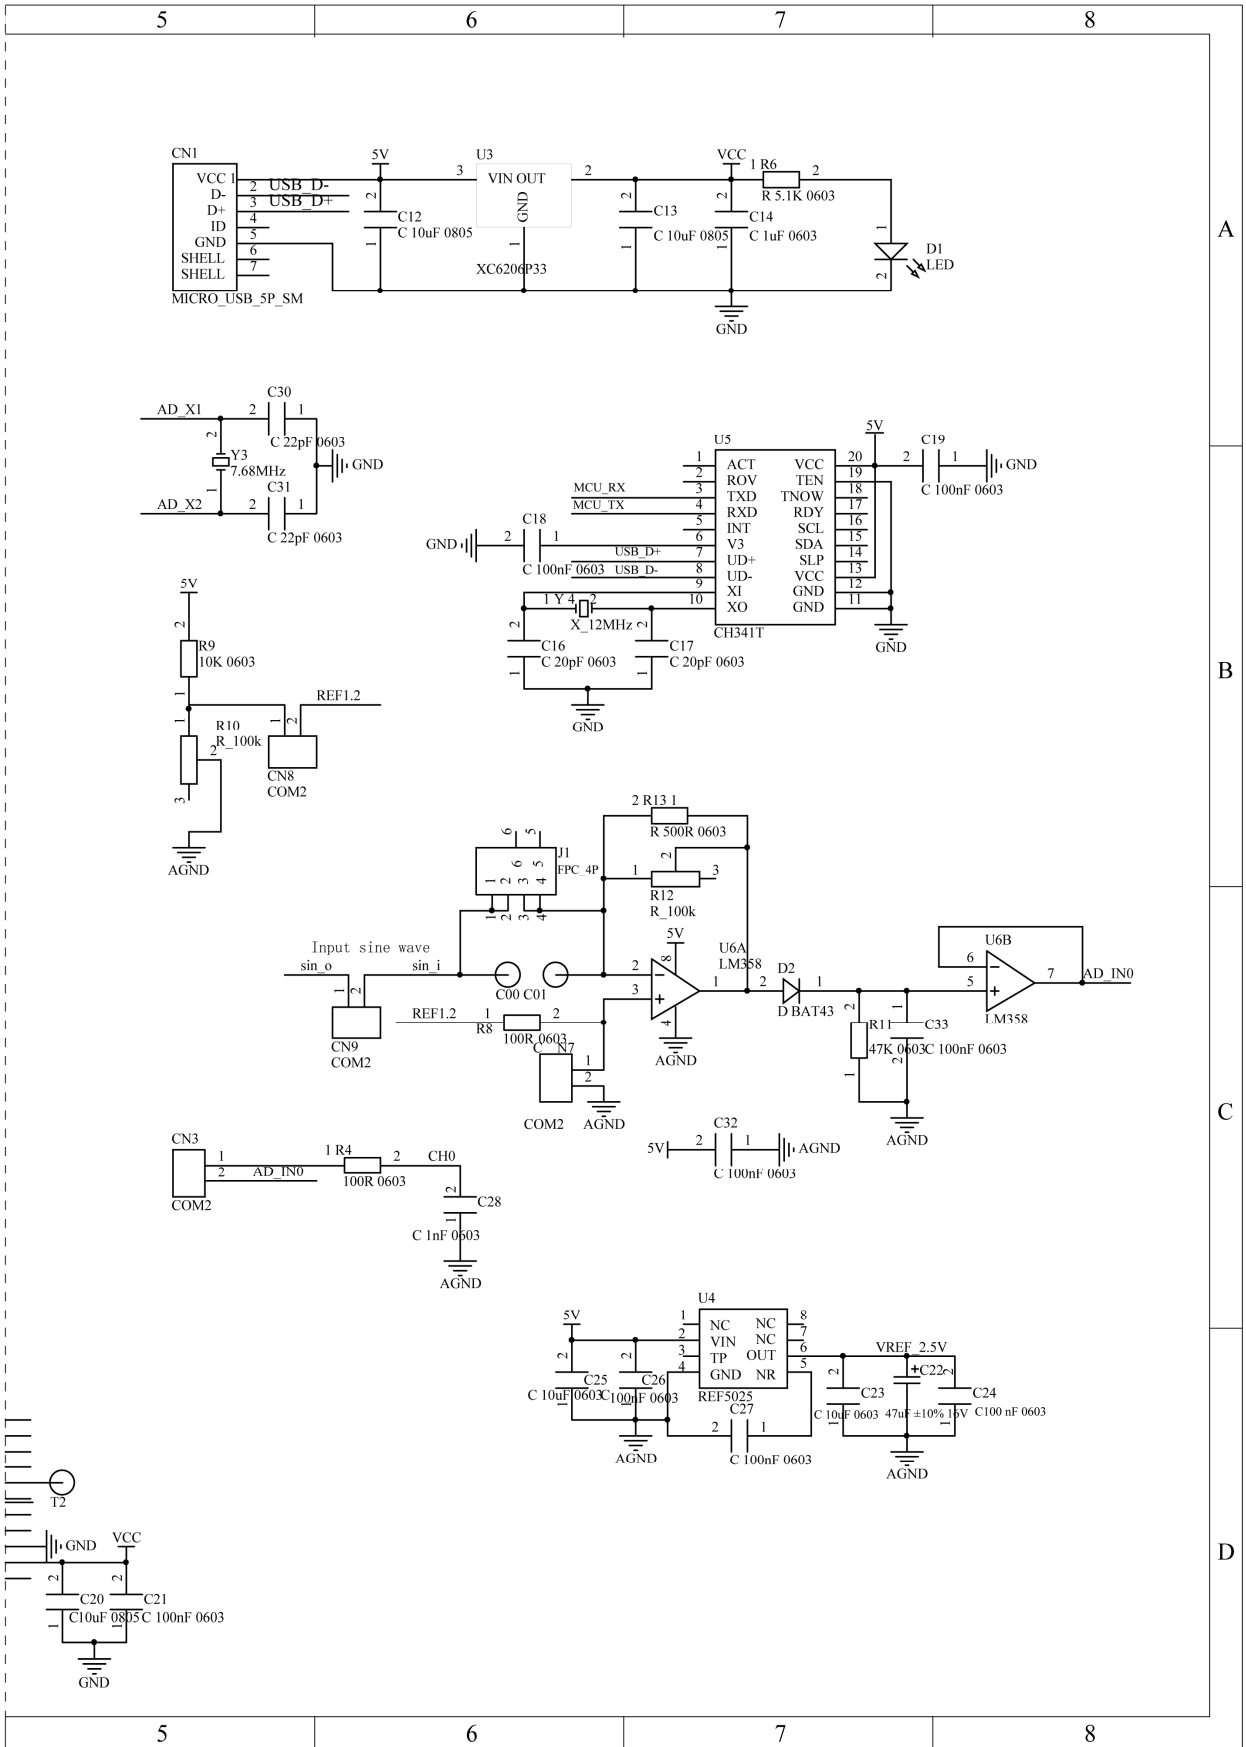

**Supplementary Fig. 12.** Schematic design diagram of the digital circuit board. The inset is a digital photograph of the circuit board.

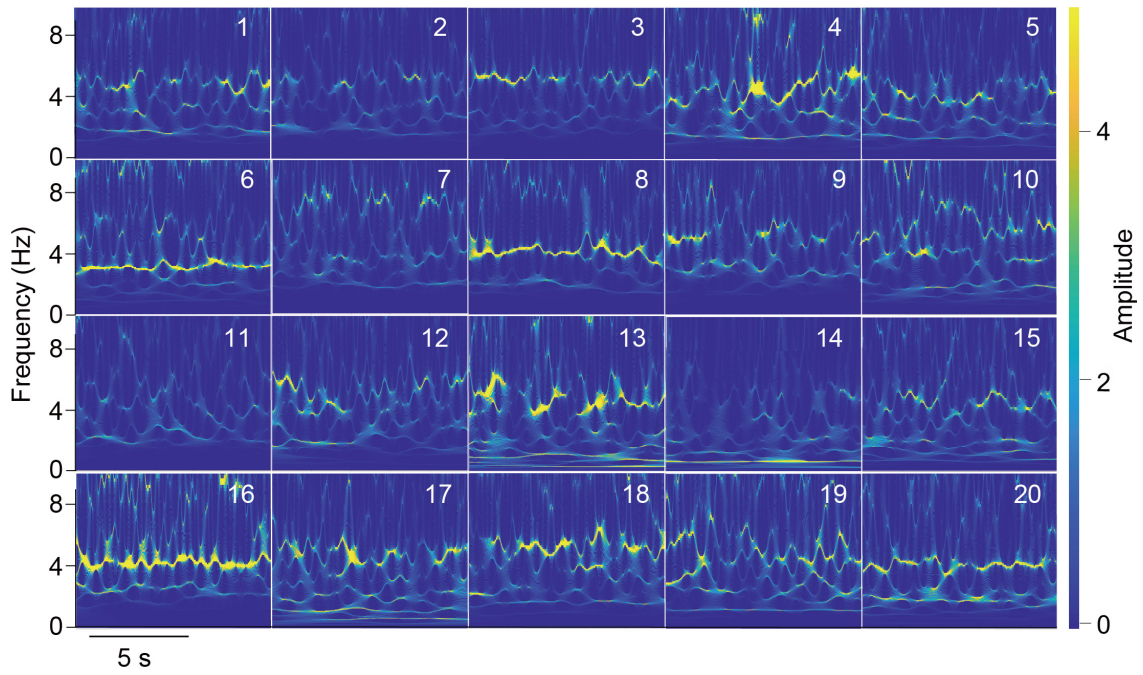

**Supplementary Fig. 13.** Frequency-domain signals of the 20 textiles obtained using wavelet transform. The sliding rate is  $2 \text{ mm} \cdot \text{s}^{-1}$ .

**Supplementary Table 2. Top ten important extracted signal features**

|    | <b>Feature Name</b>                   | <b>Description</b>                                       |
|----|---------------------------------------|----------------------------------------------------------|
| 1  | Range Count                           | Count of values                                          |
| 2  | Sequence Length                       | Length of the feature sequence                           |
| 3  | Mean Quantile Change                  | Average change in quantiles                              |
| 4  | Mean Change                           | Mean change in feature values                            |
| 5  | Absolute Quantile Variance            | Variance in quantile changes (absolute)                  |
| 6  | Sequence Complexity                   | Complexity of the sequence (not normalized)              |
| 7  | 0.6 Upper Limit Abs Quantile Variance | Variance in quantile changes (absolute, 0.6 upper limit) |
| 8  | 0.6 Upper Limit Quantile Variance     | Variance in quantile changes (0.6 upper limit)           |
| 9  | Quantile Variance                     | Variance in quantile changes                             |
| 10 | Fourier Variance                      | Variance in Fourier-transformed values                   |

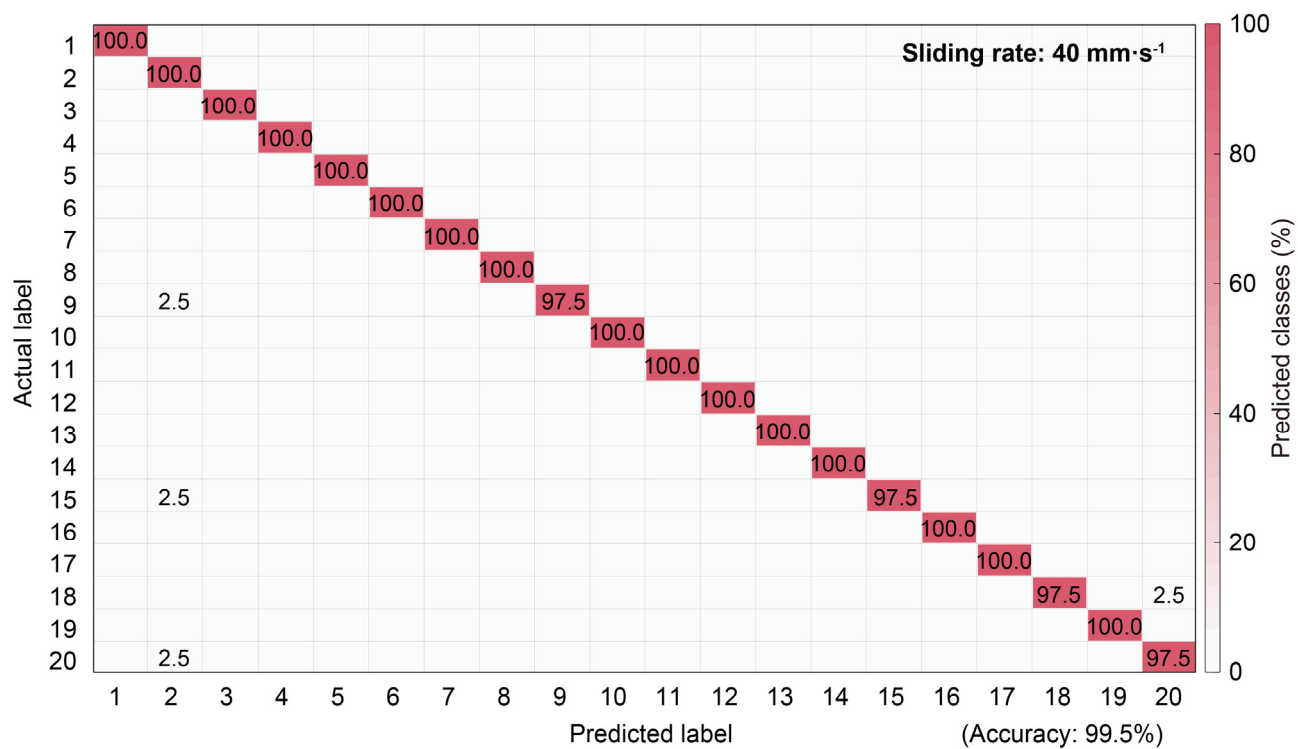

**Supplementary Fig. 14.** Recognition accuracy of the 20 textiles using the data collected at a high sliding rate of 40 mm·s<sup>-1</sup>.

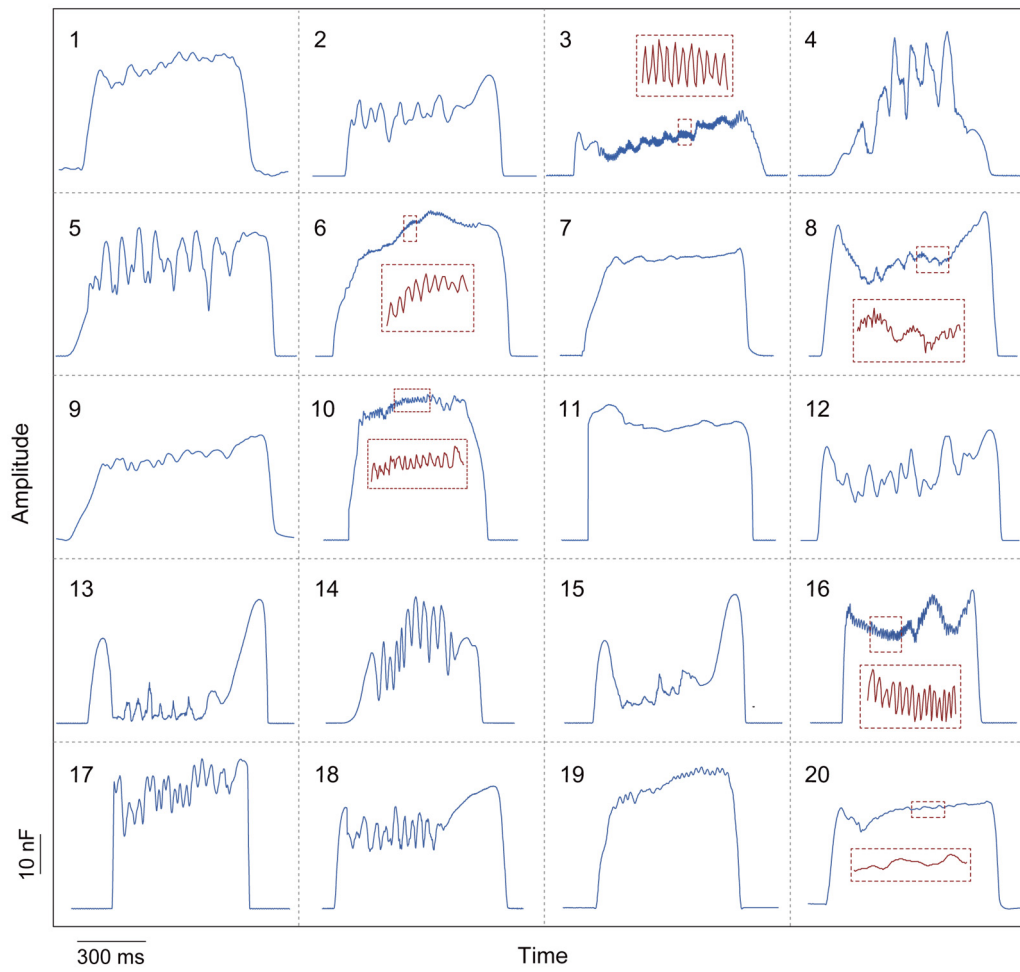

**Supplementary Fig. 15.** Time-domain signals of the slip-sensor corresponding to different textures under random sliding rates and pressures.

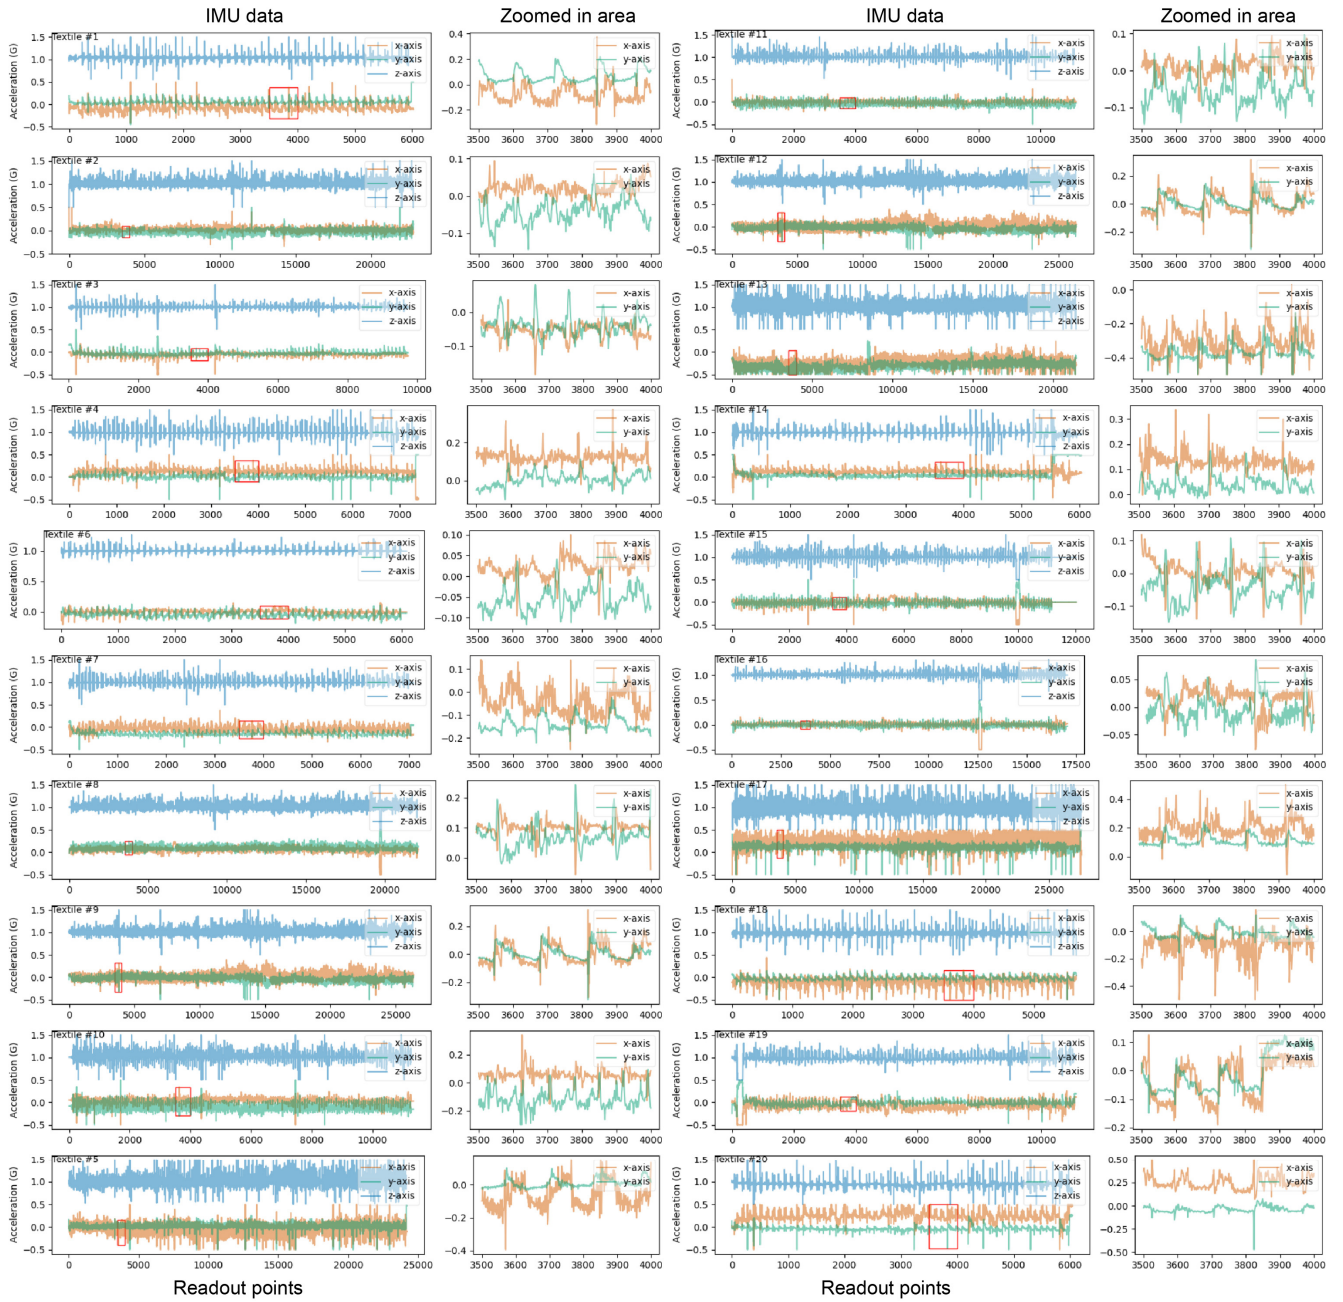

**Supplementary Fig. 16.** Change in acceleration of subject *A* when sliding on 20 textiles, with 200 times of sliding for each textile. The chaotic acceleration in the *x-y* plane corresponding to multiple sliding for each textile represents that the sliding velocities are variable and random.

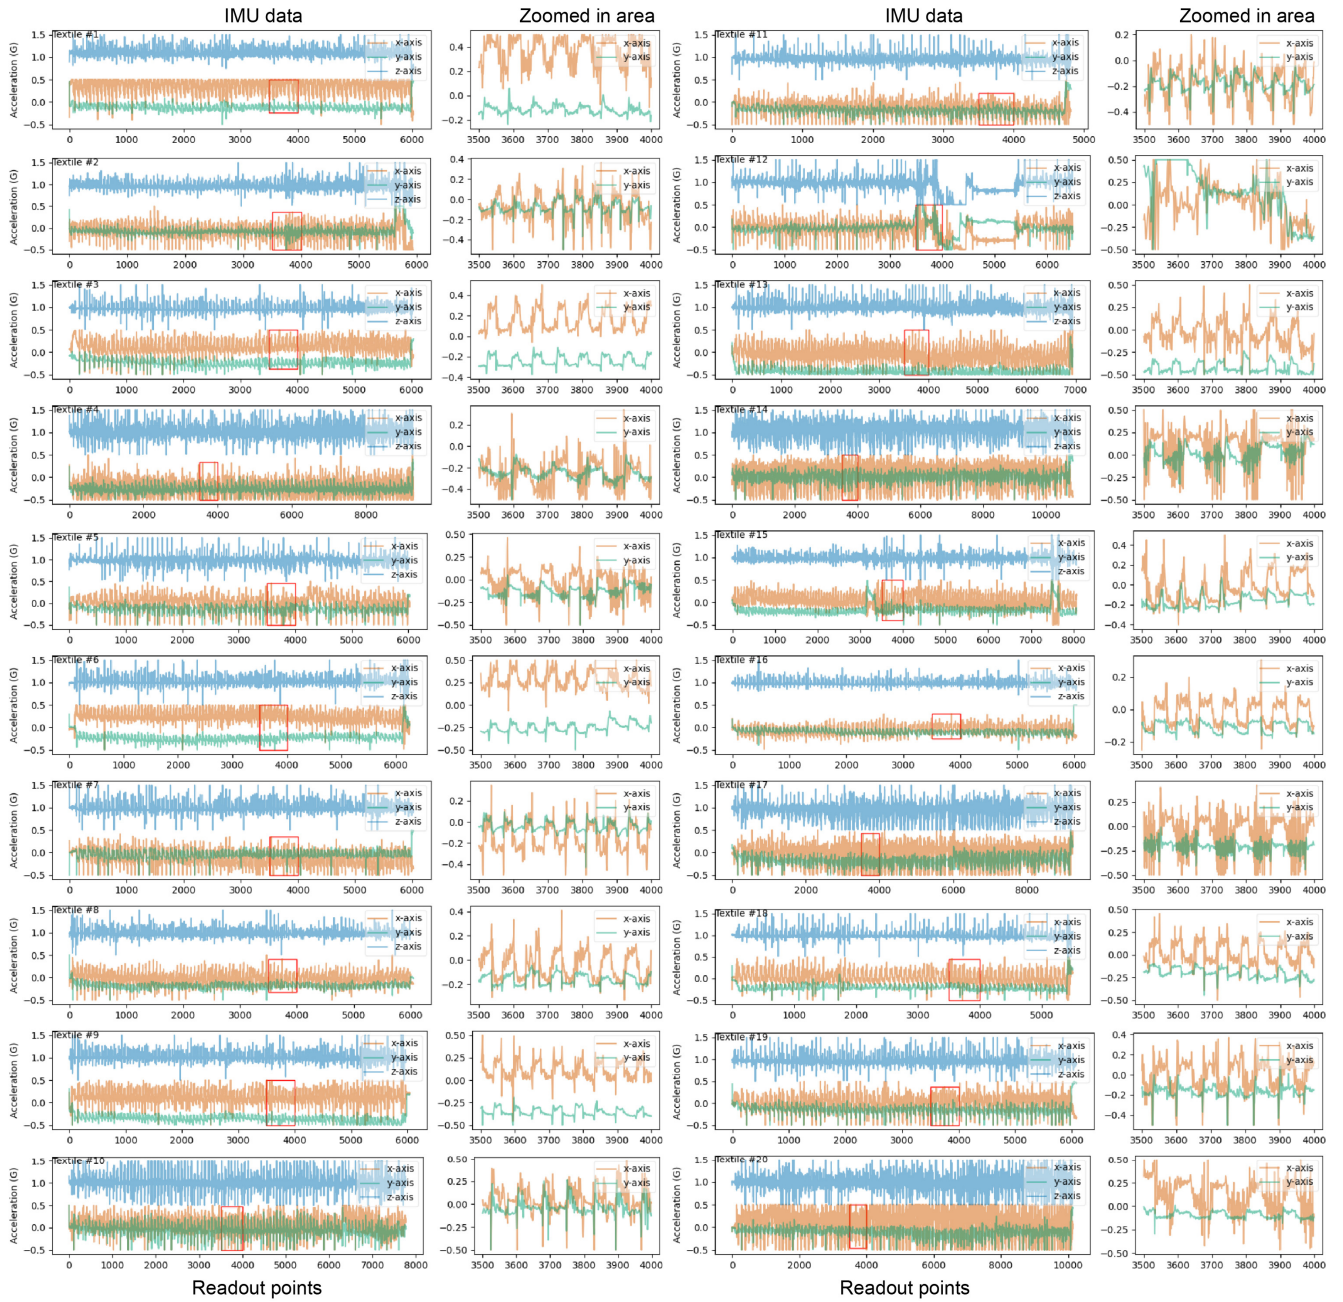

**Supplementary Fig. 17.** Change in acceleration of subject *B* when sliding on 20 textiles, with 100 times of sliding for each textile. The chaotic acceleration in the *x-y* plane corresponding to multiple sliding for each textile represents that the sliding velocities are variable and random.

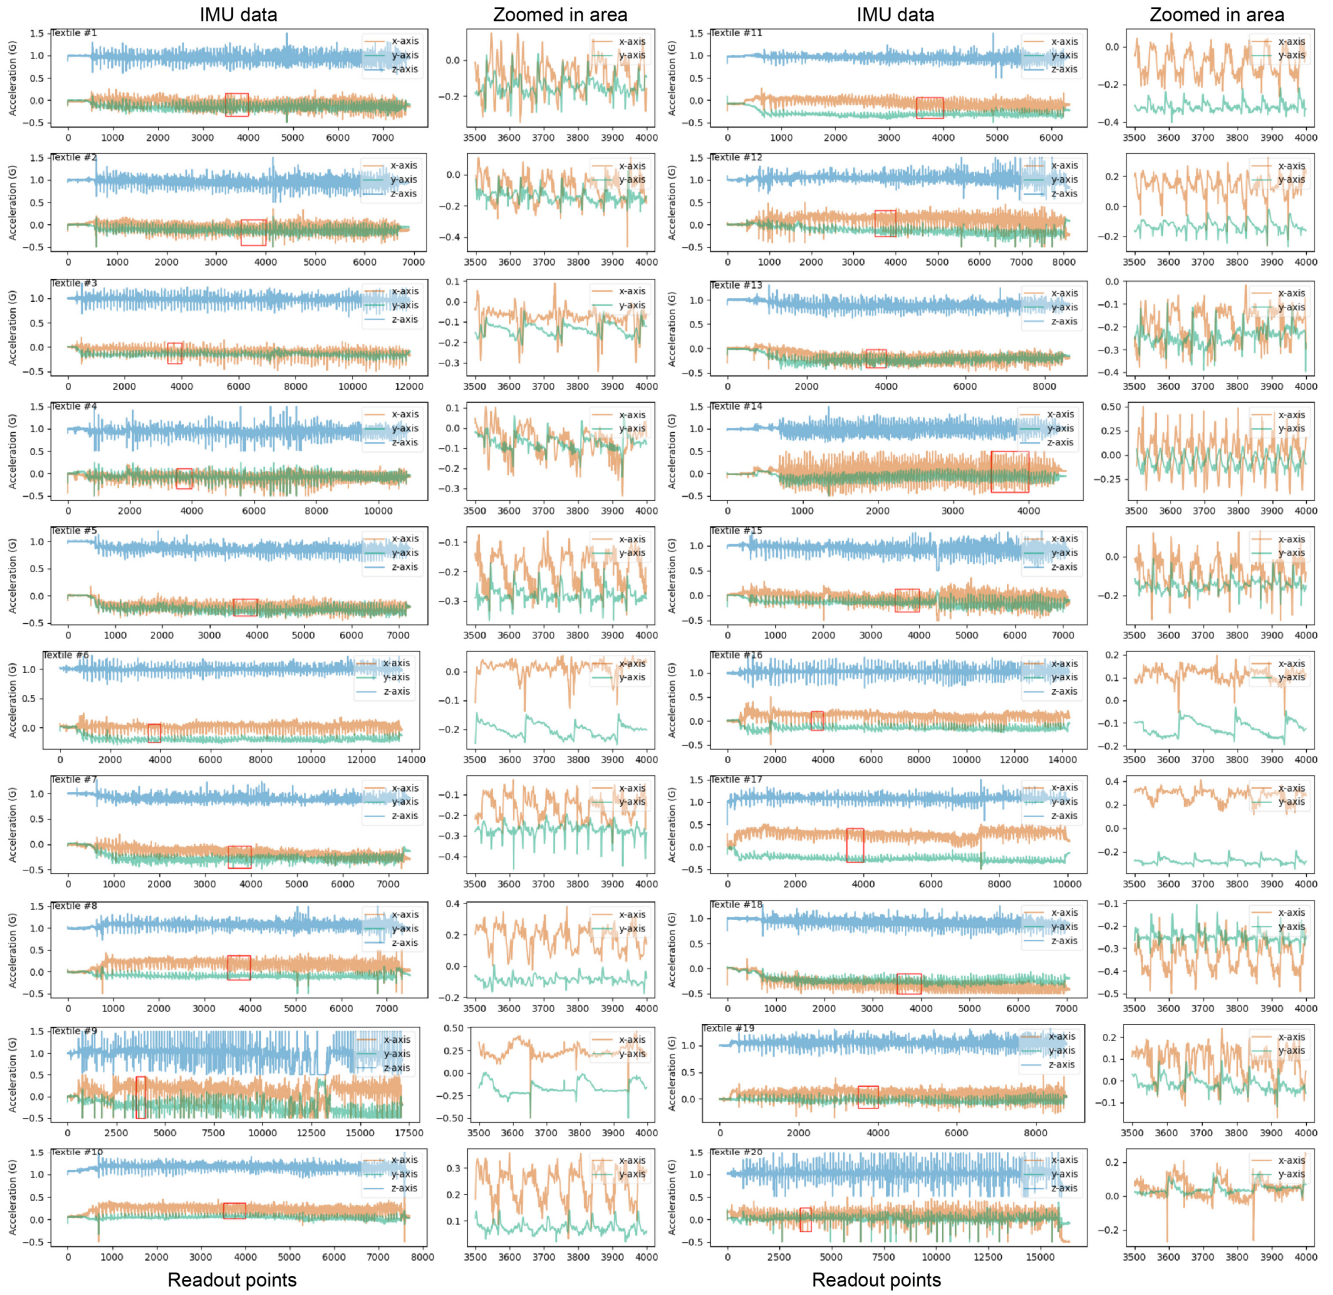

**Supplementary Fig. 18.** Change in acceleration of subject *C* when sliding on 20 textiles, with 100 times of sliding for each textile. The chaotic acceleration in the *x-y* plane corresponding to multiple sliding for each textile represents that the sliding velocities are variable and random.



**Supplementary Table 3. Comparison of our sensing system based on the slip-sensor with reported sensory systems in terms of acquisition system and recognition accuracy.**

| <b>SA signal mimicking</b>            | <b>FA signal mimicking</b> | <b>No. of acquisition systems</b> | <b>No. of recognized objects</b> | <b>Recognition accuracy</b> | <b>Reference</b>                       |
|---------------------------------------|----------------------------|-----------------------------------|----------------------------------|-----------------------------|----------------------------------------|
| Piezoresistive sensor                 | Triboelectric sensor       | Two sets                          | 12                               | 99.1%                       | <i>Nano Lett.</i> 2019, 19, 3305-3312  |
| Piezoresistive sensor                 | Piezoelectric sensor       | Two sets                          | 20                               | 99.1%                       | <i>Nat. Electron.</i> 2021, 4, 429-438 |
| Triboelectric generator               | Optical sensor             | Two sets                          | 16                               | 94.1%                       | <i>Nano Lett.</i> 2022, 22, 7275-7283  |
| Piezoresistive sensor                 | Triboelectric generator    | Two sets                          | 9                                | 94.99%                      | <i>Nano Energy</i> 2022, 96, 107137    |
| Piezoresistive sensor                 | Piezoelectric sensor       | Two sets                          | 8                                | 98.95%                      | <i>npj Flex. Electron.</i> 2022, 6, 45 |
| Piezoresistive sensor                 | Triboelectric generator    | Two sets                          | 20                               | 98.9%                       | <i>Matter</i> 2022, 5, 1481-1501       |
| <b>A single iontronic slip-sensor</b> |                            | One set                           | 20                               | 98.6%                       | <b>Our work</b>                        |

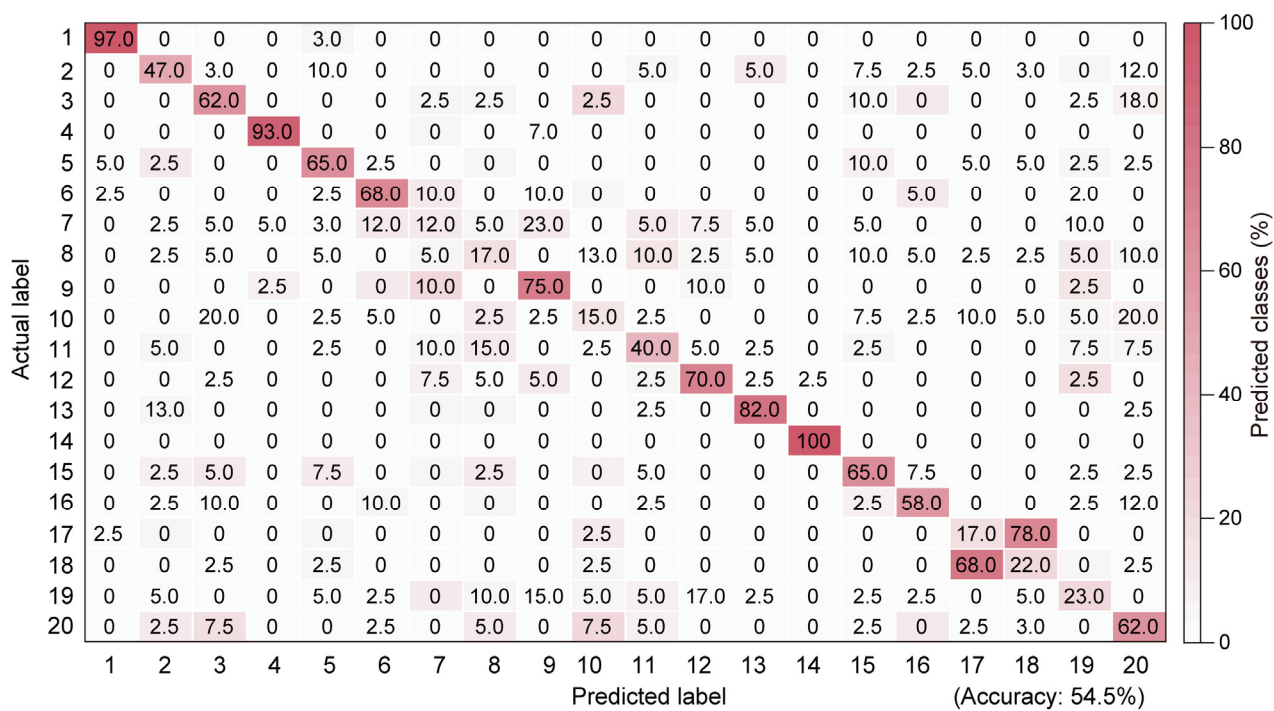

**Supplementary Fig. 19.** Recognition accuracies of the 20 textiles using the sensor without fingerprint at a sliding rate of  $2 \text{ mm} \cdot \text{s}^{-1}$ .

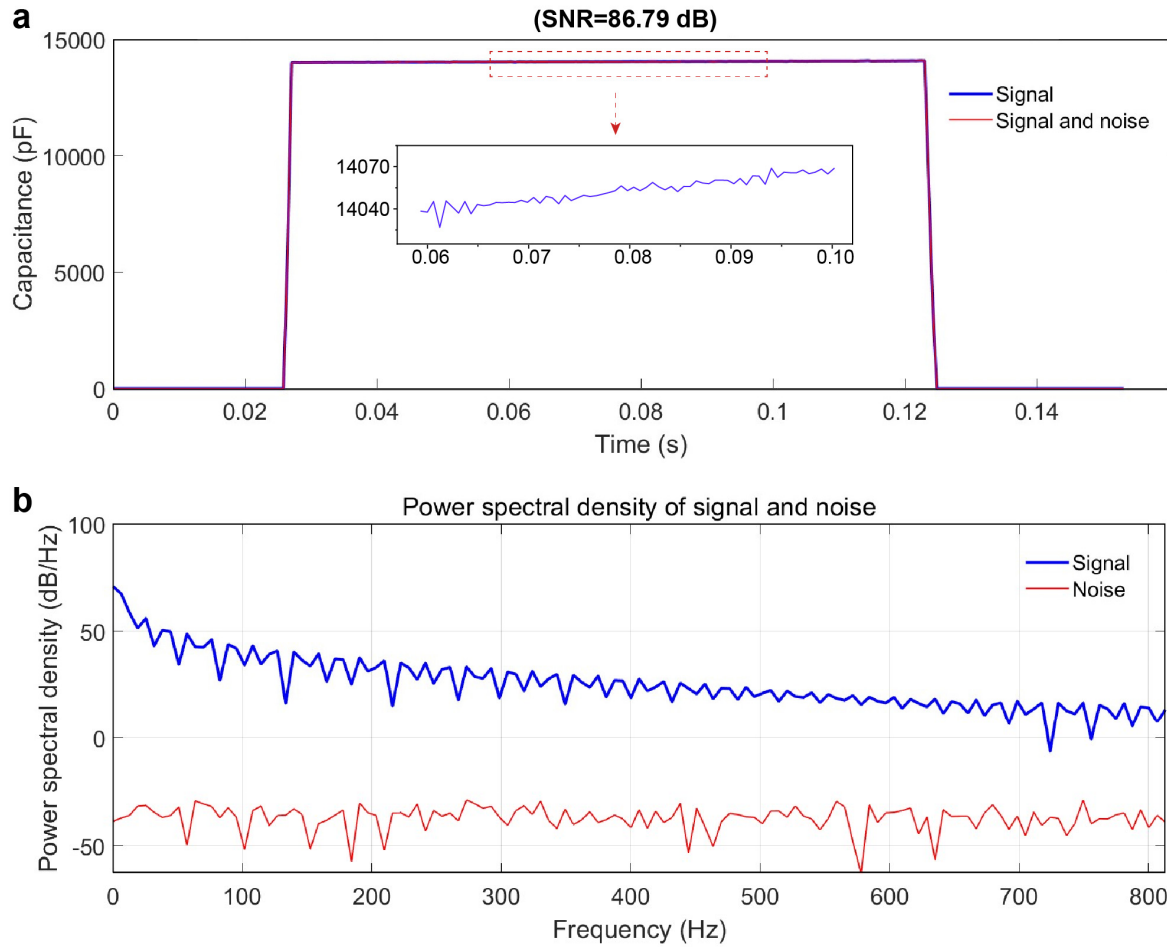

**Supplementary Fig. 20. The signal-to-noise ratio (SNR) and effective number of bits (ENOB) of the signal output of the slip-sensor. (a) Signal and noise of the slip-sensor under a pressure of 50 kPa at a high sampling frequency of 1626 Hz; (b) Power spectral density of the signal and noise. The ENOB value is determined to be 14.12 bits by the equation:  $ENOB = (SNR - 1.76) / 6.02$ .**

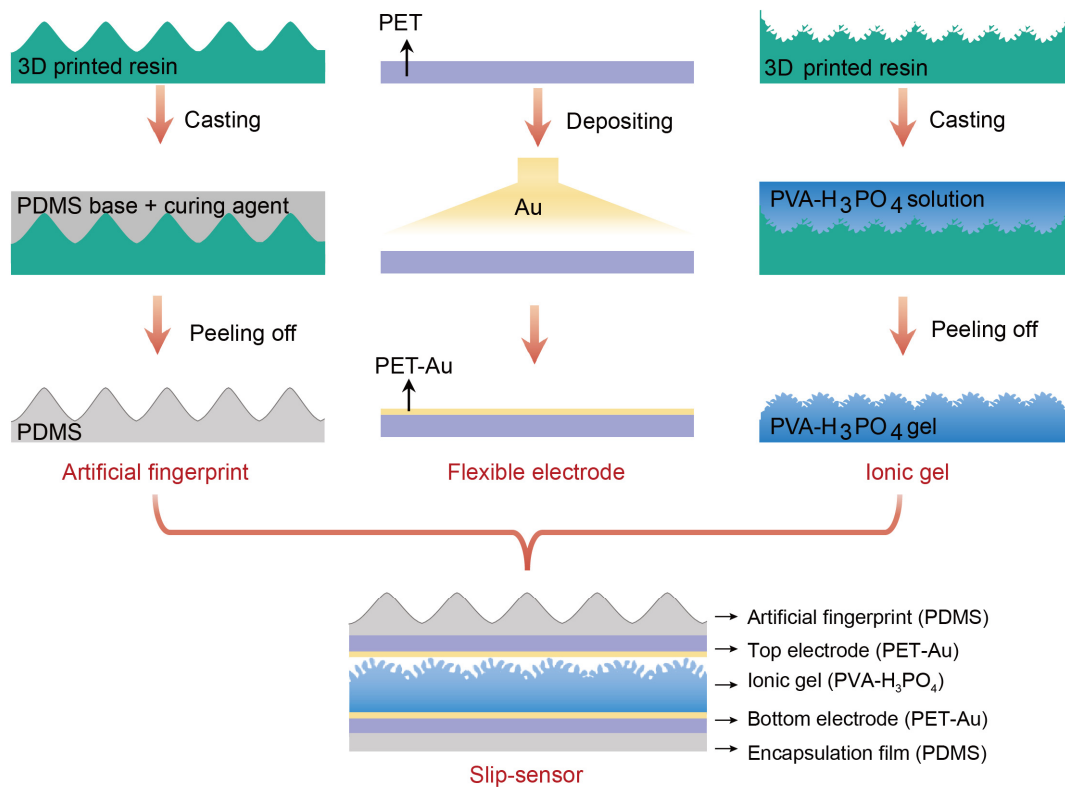

**Supplementary Fig. 21. Schematic for the preparation of the slip-sensor.** The fabrication involves in the preparation of the fingerprint, the electrode, and the ionic gel with graded microstructures.

### **The supplementary note: recognition of microstructure by human subjects**

Five volunteer subjects were selected to recognize the fine microstructures with spacings of 10, 15, 20, 30, 40, and 50  $\mu\text{m}$  together with a nonstructured surface. During the training and testing, the subjects were asked to wear eyeshades to avoid visual interference. Two copies of each sample were prepared, one set for training and other set for testing. Considering that subjects cannot remember the characteristics of identified samples for a long time, they were allowed to touch a sample from the training set searched for a match from the test set. Each identified sample were tested for 10 times by each subject, with a total of 350 tests in total by the 5 subjects. The recognition accuracy of each subject for the identified sample was determined by dividing the number of correct reports for each sample by the total number of reports for the sample. Finally, the average recognition accuracy of the five subjects for each sample was output to the confusion matrix as the final recognition result.
