# Supplementary material for: A robotic sensory system with high spatiotemporal resolution for texture recognition
Source: PubMed Central journal article supplement (PMC10645869; doi:10.1038/s41467-023-42722-4), 2023-11-14
Supplement: 41467_2023_42722_MOESM3_ESM.pdf [file 41467_2023_42722_MOESM3_ESM.pdf]

## Description of Additional Supplementary Files

**Supplementary Movie 1:** A portable and real-time sensory system for texture recognition using a prosthetic hand with a slip-sensor, operating at a consistent sliding rate of  $2 \text{ mm}\cdot\text{s}^{-1}$ .

**Supplementary Movie 2:** A portable and real-time sensory system for texture recognition using a slip-sensor integrated on a human hand, operating at random sliding rates.
